# Supplementary material
Source: PubMed Central journal article supplement (PMC6820871)
Supplement: Supp_Fig1-Fig2.pdf [file Supp_Fig1-Fig2.pdf]

## Supplementary Data

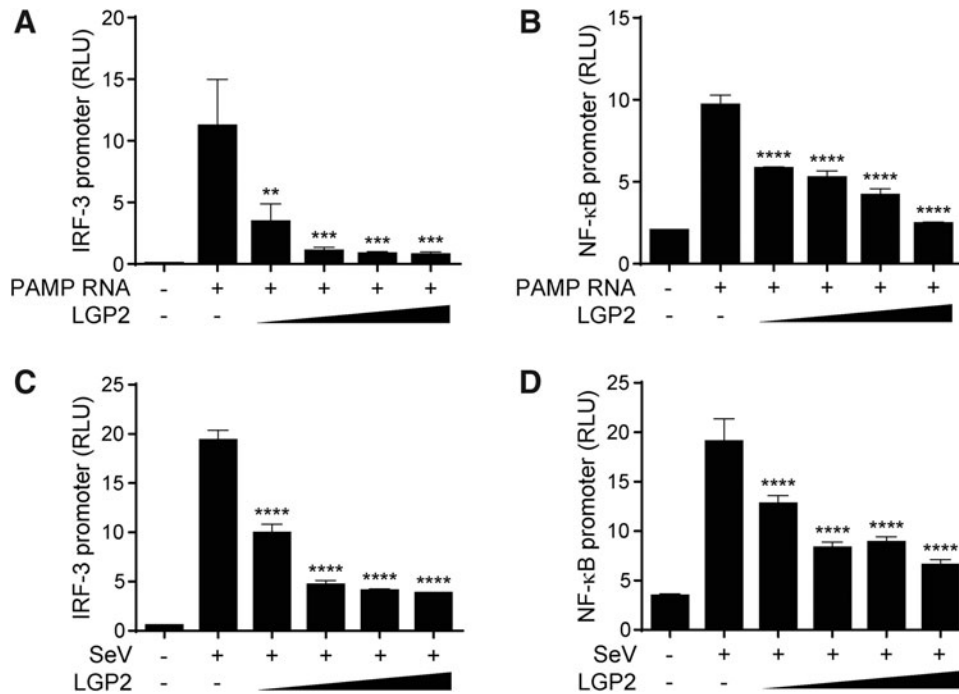

**SUPPLEMENTARY FIG. S1.** LGP2 negatively regulates both IRF-3 and NF-κB promoter activities. (A, B) HEK293 cells were transfected with 50 ng either IRF-3 promoter luciferase (A) or NF-κB promoter luciferase (B), 20 ng CMV promoter Renilla, and increasing doses of LGP2 plasmid (10, 50, 100, and 200 ng) and treated with 100 ng PAMP RNA. Data shown are average RLU of biological triplicates  $\pm$  SD analyzed by Dunnett's test with comparisons made to PAMP RNA-treated vector control (LGP2 -),  $P < 0.05$ . (C, D) HEK293 cells were transfected with 50 ng either IRF-3 promoter luciferase (C) or NF-κB promoter luciferase (D), 20 ng CMV promoter Renilla, and increasing doses of LGP2 plasmid (800 pg, 4 ng, 20 ng, and 100 ng) and infected with 50HA SeV. Data shown are average RLU of biological triplicates  $\pm$  SD analyzed by Dunnett's test with comparisons made to SeV-infected vector control (LGP2 -),  $P < 0.05$ . \*\* $P < 0.01$ ; \*\*\* $P < 0.001$ ; \*\*\*\* $P < 0.0001$ . PAMP, pathogen associated molecular pattern; RLU, relative luciferase units.

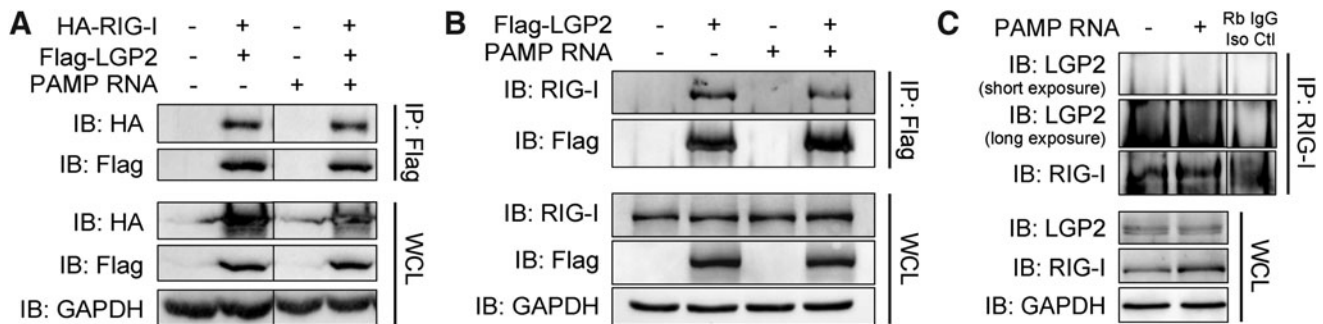

**SUPPLEMENTARY FIG. S2.** LGP2 interacts with RIG-I when coexpressed, but not at the endogenous level. (A) HEK293 cells were transfected with HA-RIG-I and Flag-LGP2 and treated with 100 ng PAMP RNA. IP was performed for Flag-LGP2. IB was performed for indicated proteins. Noncontiguous panels are from the same blot. WCL, whole cell lysate (input control). (B) HEK293 cells were transfected with Flag-LGP2 and treated with 100 ng PAMP RNA. IP was performed for Flag-LGP2. IB was performed for indicated proteins. (C) HEK293 cells were transfected with 100 ng PAMP RNA. IP was performed for endogenous RIG-I using Protein G beads conjugated to an anti-RIG-I antibody or rabbit IgG isotype control antibody (Rb IgG Iso Ctl). IB was performed for indicated proteins. Noncontiguous panels are from the same blot. RIG-I, retinoic acid-inducible gene I; IB, immunoblot; IP, immunoprecipitation.
